# Supplementary material
Source: ML conference proceedings conference paper supplement (https://proceedings.mlr.press/v108/kuzelka20a.html)
Supplement: Supplementary file 1 [file kuzelka20a-supp.pdf]

---

# Domain-Liftability of Relational Marginal Polytopes (Appendix)

---

**Ondřej Kuželka**

Czech Technical University in Prague, Czech Republic

**Yuyi Wang**

ETH Zurich, Switzerland

## A A Lemma Used in Theorem 3

**Lemma 1.** *Given a set  $S$  of linear inequality constraints, there is an algorithm to find a minimal subset  $S' \subseteq S$  such that  $S'$  specifies the same polytope as  $S$ , in polynomial time in the size of  $S$ .*

*Proof.* Without loss of generality, we assume that every constraint  $c_j$  in  $S$  is of the form  $\sum_i a_{j,i}x_i \leq b_j$ . We construct  $|S|$  linear programs: The  $i$ -th linear program uses all constraints in  $S$  except  $c_j$  as the constraints, and its objective function is  $\max \sum_i a_{j,i}x_i$ . If the optimal solution of this linear program is strictly larger than  $b_j$ , then we add  $c_j$  into  $S'$ . It is not difficult to see that every constraint in  $S'$  cannot be implied by other constraints, or else that constraint cannot be added into  $S'$ , so  $S'$  is minimal. Besides, we only have  $|S|$  linear programs each of which can be solved in polynomial time (e.g., using some interior-point methods), hence the whole procedure is in polynomial time.  $\square$
